# Supplementary material for: Antimicrobial Activity of Fermented Vegetable Byproduct Extracts for Food Applications
Source: MDPI journal article supplement (doi:10.3390/foods10051092), 2021-05-14
Supplement: s1 [file s1]

## Supplementary Materials

Table S1. Effect of fermented extracts on food preservation. Total bacterial load (Log CFU/g) in minced pork meat added or not with fermented tomato extract/preservative. ANOVA test was used to evaluate differences among treatments (addition or not of fermented extracts/preservatives) at the same time of storage.

| Sample                                   | T <sub>0</sub> | T <sub>3</sub>           | T <sub>6</sub>            | T <sub>9</sub>            |
|------------------------------------------|----------------|--------------------------|---------------------------|---------------------------|
| Minced meat (control)                    |                | 8.51 ± 0.14 <sup>e</sup> | 9.68 ± 0.41 <sup>d</sup>  | 10.48 ± 0.03 <sup>c</sup> |
| Fermented extract (0.8 %)                |                | 7.32 ± 0.00 <sup>c</sup> | 8.68 ± 0.30 <sup>c</sup>  | 8.51 ± 0.51 <sup>b</sup>  |
| Fermented extract (1.2 %)                |                | 6.61 ± 0.04 <sup>b</sup> | 7.92 ± 0.03 <sup>b</sup>  | 8.05 ± 0.01 <sup>ab</sup> |
| Fermented extract (1.6 %)                | 6.94 ± 0.10    | 6.43 ± 0.03 <sup>b</sup> | 7.59 ± 0.01 <sup>ab</sup> | 7.93 ± 0.11 <sup>a</sup>  |
| Fermented extract (2.4 %)                |                | 6.04 ± 0.03 <sup>a</sup> | 7.35 ± 0.15 <sup>a</sup>  | 7.61 ± 0.04 <sup>a</sup>  |
| 1.2 % of sodium lactate                  |                | 8.09 ± 0.04 <sup>d</sup> | 9.47 ± 0.16 <sup>d</sup>  | 10.04 ± 0.07 <sup>c</sup> |
| 2.5 % of sodium lactate/sodium diacetate |                | 7.31 ± 0.19 <sup>c</sup> | 7.23 ± 0.08 <sup>a</sup>  | 7.63 ± 0.49 <sup>a</sup>  |

Table S2. Effect of fermented tomato extracts on *Salmonella* spp. *Salmonella* spp. concentration (Log CFU/g) in minced pork meat added or not with fermented tomato extract/preservative. ANOVA test was used to evaluate differences among treatments (addition or not of fermented extracts/preservatives) at the same time of storage.

| Sample                                   | T <sub>0</sub> | T <sub>3</sub>            | T <sub>6</sub>           | T <sub>9</sub>           |
|------------------------------------------|----------------|---------------------------|--------------------------|--------------------------|
| Minced meat (control)                    |                | 6.58 ± 0.17 <sup>c</sup>  | 6.90 ± 0.12 <sup>c</sup> | 7.69 ± 0.12 <sup>c</sup> |
| Fermented extract (1.6 %)                |                | 5.64 ± 0.08 <sup>a</sup>  | 5.54 ± 0.07 <sup>a</sup> | 5.14 ± 0.25 <sup>a</sup> |
| 1.2 % of sodium lactate                  | 5.99 ± 0.05    | 6.29 ± 0.29 <sup>bc</sup> | 7.09 ± 0.20 <sup>c</sup> | 7.91 ± 0.19 <sup>c</sup> |
| 2.5 % of sodium lactate/sodium diacetate |                | 6.02 ± 0.26 <sup>ab</sup> | 6.11 ± 0.07 <sup>b</sup> | 5.99 ± 0.12 <sup>b</sup> |

Table S3. Effect of fermented tomato extracts on *L. monocytogenes*. Behaviour of *L. monocytogenes* (Log CFU/g) in minced pork meat added or not with fermented tomato extract/preservative. ANOVA test was used to evaluate differences among treatments (addition or not of fermented extracts/preservatives) at the same time of storage.

| Sample                                   | T <sub>0</sub> | T <sub>3</sub>            | T <sub>6</sub>            | T <sub>9</sub>           |
|------------------------------------------|----------------|---------------------------|---------------------------|--------------------------|
| Minced meat (control)                    |                | 5.64 ± 0.01 <sup>a</sup>  | 5.91 ± 0.08 <sup>c</sup>  | 6.18 ± 0.07 <sup>d</sup> |
| Fermented extract (1.6 %)                |                | 5.56 ± 0.04 <sup>a</sup>  | 5.35 ± 0.02 <sup>a</sup>  | 4.41 ± 0.02 <sup>a</sup> |
| 1.2 % of sodium lactate                  | 5.79 ± 0.13    | 5.84 ± 0.07 <sup>b</sup>  | 5.86 ± 0.18 <sup>bc</sup> | 5.93 ± 0.04 <sup>c</sup> |
| 2.5 % of sodium lactate/sodium diacetate |                | 5.70 ± 0.16 <sup>ab</sup> | 5.70 ± 0.09 <sup>b</sup>  | 5.50 ± 0.05 <sup>b</sup> |

Table S4. Effect of fermented tomato extracts on *B. cereus*. Behaviour of *B. cereus* (Log CFU/g) in minced pork meat added or not with fermented tomato extract/preservative. ANOVA test was used to evaluate differences among treatments (addition or not of fermented extracts/preservatives) at the same time of storage.

| Sample                    | T <sub>0</sub> | T <sub>3</sub>           | T <sub>6</sub>           | T <sub>9</sub>           |
|---------------------------|----------------|--------------------------|--------------------------|--------------------------|
| Minced meat (control)     |                | 6.48 ± 0.67 <sup>b</sup> | 6.96 ± 0.06 <sup>b</sup> | 7.39 ± 0.30 <sup>b</sup> |
| Fermented extract (1.6 %) | 4.74 ± 0.06    | 4.82 ± 0.80 <sup>a</sup> | 4.35 ± 0.07 <sup>a</sup> | 5.15 ± 0.21 <sup>a</sup> |
| 1.2 % of sodium lactate   |                | 5.97 ± 0.39 <sup>b</sup> | 7.02 ± 0.34 <sup>b</sup> | 7.32 ± 0.22 <sup>b</sup> |

|                                          |                   |                   |                   |
|------------------------------------------|-------------------|-------------------|-------------------|
| 2.5 % of sodium lactate/sodium diacetate | $4.54 \pm 0.09^a$ | $4.50 \pm 0.71^a$ | $5.28 \pm 0.02^a$ |
|------------------------------------------|-------------------|-------------------|-------------------|

---
